# Supplementary material for: ABCA3-related interstitial lung disease beyond infancy
Source: PubMed Central journal article supplement — Thorax. 2023 Feb 20;78(6):587–95. doi: 10.1136/thorax-2022-219434 (PMC10314027; doi:10.1136/thorax-2022-219434), 2023-02-20
Supplement: thorax-2022-219434supp001.pdf [file thorax-2022-219434supp001.pdf]

## 1 Supplement Files

2 Supplement table 1. Characteristics of patients with *ABCA3* variants and surviving beyond age 1 year of life from the kids lung register.

| Pt_ID            | Age at Last FU_Year | Mutations            | Variant Type | Poly Phen-2 | PROV EAN | ClinVar                  | Freq. of Variant | Geno type | Age at death/LTX* | Ref    |
|------------------|---------------------|----------------------|--------------|-------------|----------|--------------------------|------------------|-----------|-------------------|--------|
| <b>Hypo/Hypo</b> |                     |                      |              |             |          |                          |                  |           |                   |        |
| P1               | 1.2                 | p.V1399M (c.4195G>A) | Missense     | 1.000       | -2.853   | -                        | 7.97E-06         | Homo      | 1.2*              |        |
| P2               | 1.3                 | p.E292V (c.875A>T)   | Missense     | 0.990       | -6.533   | Likely-pathogenic        | 3.98E-06         | Homo      |                   |        |
| P3               | 1.3                 | p.G202R (c.604G>A)   | Missense     | 0.742       | -7.254   | -                        | 1.59E-05         | Homo      |                   |        |
| P4               | 1.8                 | p.W308R (c.922T>C)   | Missense     | 1.000       | -8.367   | -                        | -                | Homo      | 1.8*              | [1, 2] |
| P5               | 2.3                 | p.K537R (c.1610A>G)  | Missense     | 1.000       | -2.850   | -                        | -                | Homo      |                   |        |
| P6               | 2.5                 | p.R43H (c.128G>A)    | Missense     | 0.000       | -3.494   | Pathogenic               | 1.77E-05         | Homo      |                   |        |
| P7               | 2.8                 | p.R280C (c.838C>T)   | Missense     | 0.973       | -5.467   | Conflicting <sup>#</sup> | 1.60E-04         | Compt     |                   |        |
|                  |                     | p.A90D (c.269C>A)    | Missense     | 0.544       | -3.400   | -                        | -                |           |                   |        |
| P8               | 3.6                 | p.E292V (c.875A>T)   | Missense     | 0.990       | -6.533   | Likely-pathogenic        | 3.98E-06         | Compt     |                   | [2]    |
|                  |                     | p.Y963C (c.2888A>G)  | Missense     | 1.000       | -8.267   | -                        | -                |           |                   |        |
| P9               | 3.6                 | p.P32S (c.94C>T)     | Missense     | 0.902       | -2.963   | -                        | -                | Compt     | 3.6               | [2]    |
|                  |                     | p.G1314E (c.3941G>A) | Missense     | 1.000       | -7.696   | -                        | -                |           |                   |        |
| P10              | 4.2                 | p.E292V (c.875A>T)   | Missense     | 0.990       | -6.533   | Likely-pathogenic        | 3.98E-06         | Homo      |                   |        |
| P11              | 4.4                 | p.R43C (c.127C>T)    | Missense     | 0.998       | -6.043   | -                        | 7.07E-06         | Compt     | 4.4               | [2]    |
|                  |                     | p.R208W (c.622C>T)   | Missense     | 0.846       | -5.285   | -                        | 2.40E-05         |           |                   |        |
| P12              | 4.7                 | p.L798P (c.2393T>C)  | Missense     | 1.000       | -6.603   | -                        | -                | Compt     |                   | [2]    |
|                  |                     | p.R1612P (c.4835G>C) | Missense     | 0.322       | -2.406   | -                        | -                |           |                   |        |

|     |      |                        |          |       |        |                        |          |       |     |     |
|-----|------|------------------------|----------|-------|--------|------------------------|----------|-------|-----|-----|
| P13 | 5.0  | p.R288K (c.863G>A)     | Missense | 0.001 | 0.670  | Conflicting            | 6.13E-03 | Compt |     |     |
|     |      | p.S693L (c.2078C>T)    | Missense | 0.945 | -5.895 | Uncertain <sup>c</sup> | 2.59E-04 |       |     |     |
| P14 | 5.0  | p.R208W (c.622C>T)     | Missense | 0.846 | -5.285 | -                      | 2.40E-05 | Compt | 5*  | [3] |
|     |      | p.M760R (c.2279T>G)    | Missense | 0.989 | -4.667 | -                      | 2.48E-05 |       |     |     |
| P15 | 6.0  | p.A348P (c.1042G>C)    | Missense | 0.506 | -2.113 | -                      | -        | Compt |     |     |
|     |      | c.1285+4_1285+7del AGT | Intron   | UK    | UK     | -                      | -        |       |     |     |
| P16 | 6.9  | p.R288K (c.863G>A)     | Missense | 0.001 | 0.670  | Conflicting            | 6.13E-03 | Compt |     |     |
|     |      | p.N124S (c.371A>G)     | Missense | 0.243 | -1.600 | Conflicting            | 1.03E-03 |       |     |     |
| P17 | 7.0  | p.Q1045R (c.3134A>G)   | Missense | 0.992 | -3.000 | -                      | -        | Homo  |     | [2] |
| P18 | 7.3  | p.E292V (c.875A>T)     | Missense | 0.990 | -6.533 | Likely-pathogenic      | 3.98E-06 | Compt |     |     |
|     |      | p.G571R (c.1711G>C)    | Missense | 1.000 | -7.600 | -                      | 1.59E-05 |       |     |     |
| P19 | 9.4  | p.P766S (c.2296C>T)    | Missense | 0.080 | -5.578 | Conflicting            | 1.66E-03 | Compt |     |     |
|     |      | p.T1472R (c.4415C>G)   | Missense | 1.000 | -5.672 | -                      | -        |       |     |     |
| P20 | 10.5 | p.R208W (c.622C>T)     | Missense | 0.846 | -5.285 | -                      | 2.40E-05 | Compt |     | [2] |
|     |      | c.3863-98C>T           | Intron   | UK    | UK     | Pathogenic             | -        |       |     |     |
| P21 | 10.7 | p.E292V (c.875A>T)     | Missense | 0.990 | -6.533 | Likely-pathogenic      | 3.98E-06 | Compt |     |     |
|     |      | p.G571R (c.1711G>C)    | Missense | 1.000 | -7.600 | -                      | 1.59E-05 |       |     |     |
| P22 | 11.0 | p.R43H (c.128G>A)      | Missense | 0.995 | -3.494 | Pathogenic             | 1.77E-05 | Homo  |     |     |
| P23 | 11.4 | p.A348P (c.1042G>C)    | Missense | 0.506 | -2.113 | -                      | -        | Compt |     |     |
|     |      | c.1285+4_1285+7delAGT  | intron   | UK    | UK     | -                      | -        |       |     |     |
| P24 | 11.7 | p.M363I (c.1089G>T)    | Missense | 0.675 | -3.013 | -                      | -        | Compt |     |     |
|     |      | p.H626Y (c.1876C>T)    | Missense | 1.000 | -5.700 | -                      | -        |       |     |     |
| P25 | 12.0 | p.E292V (c.875A>T)     | Missense | 0.990 | -6.533 | Likely-pathogenic      | 3.98E-06 | Compt | 12* |     |
|     |      | p.T1114M (c.3341C>T)   | Missense | 0.959 | -2.703 | -                      | 1.74E-05 |       |     |     |

|                   |      |                      |                |       |        |                   |          |       |        |
|-------------------|------|----------------------|----------------|-------|--------|-------------------|----------|-------|--------|
| P26               | 12.4 | p.E292V (c.875A>T)   | Missense       | 0.990 | -6.533 | Likely-pathogenic | 3.98E-06 | Compt |        |
|                   |      | p.P248L (c.743C>T)   | Missense       | 0.997 | -8.000 | -                 | 7.97E-06 |       |        |
| P27               | 13.4 | p.P248S (c.742C>T)   | Missense       | 1.000 | -5.800 | -                 | -        | Homo  |        |
| P28               | 13.6 | p.D953H (c.2857G>C)  | Missense       | 0.968 | -1.232 | -                 | -        | Compt | [2]    |
|                   |      | p.F1007I (c.3091T>A) | Missense       | 0.205 | -4.067 | -                 | -        |       |        |
| P29               | 13.5 | p.P246L (c.737C>T)   | Missense       | 0.969 | -9.333 | -                 | 7.98E-06 | Compt |        |
|                   |      | p.L1104R (c.3311T>G) | Missense       | 0.993 | -5.370 | Uncertain         | -        |       |        |
| P30               | 16.2 | p.R208W (c.622C>T)   | Missense       | 0.846 | -5.285 | -                 | 2.40E-05 | Compt |        |
|                   |      | p.S411Y (c.1232C>A)  | Missense       | 0.984 | -4.183 | Uncertain         | -        |       |        |
| P31 <sup>*1</sup> | 20.3 | p.R20L (c.59G>T)     | Missense       | 1.000 | -6.165 | -                 | 8.00E-06 | Compt |        |
|                   |      | p.G961= (c.2883C>T)  | Synonymo<br>us | UK    | UK     | Likely pathogenic | -        |       |        |
| P32 <sup>*2</sup> | 21.2 | p.F245L (c.733T>C)   | Missense       | 0.897 | -5.533 | -                 | -        | Compt |        |
|                   |      | p.E292V (c.875A>T)   | Missense       | 0.990 | -6.533 | Likely-pathogenic | 3.98E-06 |       |        |
| P33 <sup>*3</sup> | 27.7 | p.G964S (c.2890G>A)  | Missense       | 0.995 | -5.100 | -                 | 4.09E-06 | Compt |        |
|                   |      | p.R1482W (c.4444C>T) | Missense       | 1.000 | -7.563 | -                 | -        |       |        |
| P34 <sup>*4</sup> | 29.2 | p.G964D (c.2891G>A)  | Missense       | 0.998 | -6.033 | -                 | -        | Homo  | [2, 4] |
| P35 <sup>*5</sup> | 44.6 | p.R709W (c.2125C>T)  | Missense       | 0.339 | UK     | Conflicting       | 1.37E-03 | Compt | [2]    |
|                   |      | p.I1193M (c.3579C>G) | Missense       | 0.895 | -2.642 | -                 | 1.59E-05 |       |        |
| P36 <sup>*6</sup> | 57.0 | p.G964D (c.2891G>A)  | Missense       | 0.998 | -6.033 | -                 | -        | Homo  | [2, 4] |
| P37 <sup>*7</sup> | 70.3 | p.R43C (c.127C>T)    | Missense       | 0.998 | -6.043 | -                 | 7.07E-06 | Compt |        |
|                   |      | p.G1002S (c.3004G>A) | Missense       | 0.826 | -3.650 | -                 | 4.14E-06 |       |        |
| <b>Hypo/null</b>  |      |                      |                |       |        |                   |          |       |        |
| P38               | 2.2  | p.L579P (c.1736T>C)  | Missense       | 1.000 | -6.650 | -                 | -        | Compt | [2]    |

|     |                  |                                     |            |                      |        |                   |          |       |              |
|-----|------------------|-------------------------------------|------------|----------------------|--------|-------------------|----------|-------|--------------|
|     |                  | p.R1272GfsX73<br>(c.3812delG)       | Frameshift | Truncated<br>Protein | -      | -                 |          |       |              |
| P39 | 4.5              | p.E292V (c.875A>T)                  | Missense   | 0.990                | -6.533 | Likely-pathogenic | 3.98E-06 | Compt |              |
|     |                  | p.V1548GfsX31<br>(c.4643dupG)       | Frameshift | Truncated<br>Protein | -      | -                 |          |       |              |
| P40 | 6.6              | p.P969S (c.2905C>T)                 | Missense   | 0.999                | -7.033 | -                 | -        | Compt | [2]          |
|     |                  | p.D1439GfsX11<br>(c.4311-4312insG)  | Frameshift | Truncated<br>Protein | -      | -                 |          |       |              |
| P41 | 6.6              | p.E292V (c.875A>T)                  | Missense   | 0.990                | -6.533 | Likely-pathogenic | 3.98E-06 | Compt |              |
|     |                  | p.R998PfsX11<br>(c.2993delG)        | Frameshift | Truncated<br>Protein | -      | -                 |          |       |              |
| P42 | 11.8             | p.E292V (c.875A>T)                  | Missense   | 0.990                | -6.533 | Likely-pathogenic | 3.98E-06 | Compt | [2]          |
|     |                  | p.E765X<br>(c.2293G>T)              | Nonsense   | Truncated<br>Protein | -      | -                 |          |       |              |
|     |                  | <b>null/null</b>                    |            |                      |        |                   |          |       |              |
| P43 | 1.1              | p.R1333GfsX24<br>(c.3997_3998delAG) | Frameshift | Truncated<br>Protein |        | Pathogenic        | -        | Homo  | 1.1          |
| P44 | 1.5 <sup>‡</sup> | c.1897-1G>C                         | Intron     | del Ex16             | -      | -                 | -        | Homo  | 4.1/1.5* [5] |

3 ‘Age at Last FU\_Year’ was the age of patients at their last clinical visit. Age marked with ‘<sup>‡</sup>’ indicated the patient was diagnosed retrospectively  
4 (death before 2006), otherwise prospectively if not marked. All variants in compound heterozygous patients were confirmed to be in trans by  
5 analysis of the parents. Variants pathological prediction was conducted with PROVEAN v1.1.3 [6] and PolyPhen-2 [7]. The PolyPhen score ranges

6 from 0.0 (tolerated) to 1.0 (deleterious) according to the developer. When the PROVEAN score is less than -2.5, the variant is predicted to be  
7 deleterious. According to records from 'ClinVar', 'Conflicting<sup>#</sup>' in 'ClinVar' column represented 'Conflicting interpretations of pathogenicity', 'Uncertain<sup>o</sup>'  
8 represented 'Uncertain significance' and '-' represented 'not recorded'. Freq. (frequency) of variants were documented from gnomAD (v2.1.1). Genotype of patients  
9 were grouped into homozygous (Homo) and compound heterozygous (Compt). The column 'Age at death/LTX\*' was formatted in year; LTX\*:  
10 lung transplant. The 'Ref' column recorded published literature(s) by our and co-operated groups from Kids Lung Register. Patients P31 to P37  
11 were marked with asterisk and number, indicating they are seven adult patients. P32 had co-morbidity of failure of thrive, and P33 had para-  
12 psoriasis and retinopathy after hydroxychloroquine therapy, the rest 5 adult patients had no co-morbidities. UK: unknown.

13

14 **Supplement table 2.** Genetic information of patients with *ABCA3* variants who died, got lung transplanted or lost follow up before 1 year old.

| Age at last visit_Year | Mutations                         | Variant Type | Poly Phen-2 | PROVE AN | ClinVar     | Freq. of Variant | Genotype | Age at death/LTX* | Ref |
|------------------------|-----------------------------------|--------------|-------------|----------|-------------|------------------|----------|-------------------|-----|
| <b>Hypo/Hypo</b>       |                                   |              |             |          |             |                  |          |                   |     |
| 0.28                   | p.V1399M (c.4195G>A)              | Missense     | 1.000       | -2.850   | -           | 7.97E-06         | Homo     | 0.28              | [2] |
| 0.38                   | p.E1364K (c.4090G>A)              | Missense     | 1.000       | -3.850   | -           | -                | Homo     | 0.38              | [2] |
| 0.58                   | p.G1314R (c.3940G>C)              | Missense     | 1.000       | -7.700   | -           | -                | Homo     | 0.58              | [2] |
| 0.07                   | p.G1314R (c.3940G>C)              | Missense     | 1.000       | -7.700   | -           | -                | Homo     | 0.07              | [2] |
| 0.06                   | p.F810CfsX2<br>(c.2429-2430delTT) | Frameshift   | -           | -        | -           | -                | Homo     | 0.06              |     |
| 0.15                   | p.P193R (c.578C>G)                | Missense     | 1.000       | -7.580   | -           | -                | Homo     | 0.15              | [2] |
| 0.30 <sup>‡</sup>      | p.P193R (c.578C>G)                | Missense     | 1.000       | -7.580   | -           | -                | Homo     | 0.30              | [2] |
| 0.05                   | p.S359del<br>(c.1076_1078delCCT)  | Deletion     | -           | -        | -           | -                | Homo     | 0.05              | [2] |
| 0.01                   | p.R280H (c.839G>A)                | Missense     | 1.000       | -2.700   | Conflicting | 8.27E-04         | Compt    |                   | [2] |
|                        | p.R1305L (c.3914G>T)              | Missense     | 0.260       | -4.890   | -           | 7.11E-06         |          |                   |     |
| 0.40 <sup>‡</sup>      | p.L1386P (c.4157 T>C)             | Missense     | 1.000       | -6.170   | -           | -                | Compt    | 0.40              | [2] |
|                        | p.L268_L269insL<br>(c.806insGCT)  | Insertion    | 1.000       | -7.740   | -           | -                |          |                   |     |
| 0.50                   | p.G964S (c.2890G>A)               | Missense     | 1.000       | -5.100   | -           | 4.09E-06         | Compt    |                   |     |
|                        | p.R709W (c.2125C>T)               | Missense     | 0.716       | -3.060   | Conflicting | 1.37E-03         |          |                   |     |
| 0.14                   | p.G1421R (c.4261G>A)              | Missense     | 1.000       | -7.700   | -           | 1.19E-05         | Compt    | 0.14              |     |
|                        | p.Q1045R (c.3134A>G)              | Missense     | 0.992       | -3.000   | -           | -                |          |                   |     |
| 0.01 <sup>‡</sup>      | p.Q215K (c.643C>A)                | Missense     | 1.000       | -3.730   | -           | -                | Compt    |                   | [2] |

|                   |                          |            |                   |         |                       |          |       |       |     |
|-------------------|--------------------------|------------|-------------------|---------|-----------------------|----------|-------|-------|-----|
|                   | p.R288K (c.863G>A)       | Missense   | 0.000             | 0.670   | Conflicting           | 6.13E-03 |       |       |     |
| 0.55 <sup>‡</sup> | p.P193S (c.577C>T)       | Missense   | 1.000             | -6.720  | -                     | -        | Compt | 0.55  | [2] |
|                   | p.G1421R (c.4261G>A)     | Missense   | 1.000             | -7.700  | -                     | 1.19E-05 |       |       |     |
| 0.55              | p.P193S (c.577C>T)       | Missense   | 1.000             | -6.720  | -                     | -        | Compt | 0.55* | [2] |
|                   | p.G1421R (c.4261G>A)     | Missense   | 1.000             | -7.700  | -                     | 1.19E-05 |       |       |     |
| 0.25              | p.G202R (c.604G>A)       | Missense   | 1.000             | -7.250  | -                     | 1.59E-05 | Compt | 0.25  |     |
|                   | p.C611R (c.1831T>C)      | Missense   | 1.000             | -11.400 | -                     | 7.95E-06 |       |       |     |
| 0.21              | p.K1388N (c.4164G>C)     | Missense   | 0.999             | -4.810  | -                     | -        | Homo  | 0.21  | [2] |
| 0.80              | p.E292V (c.875A>T)       | Missense   | 0.990             | -6.533  | Likely-<br>pathogenic | 3.98E-06 | Compt |       |     |
|                   | p.E1364K (c.4090G>A)     | Missense   | 1.000             | -3.850  | -                     | -        |       |       |     |
| 0.13 <sup>‡</sup> | p.R43L (c.128G>T)        | Missense   | 1.000             | -4.860  | -                     | -        | Compt | 0.13  | [2] |
|                   | p.R288K (c.863G>A)       | Missense   | 0.000             | 0.670   | -                     | 6.13E-03 |       |       |     |
| 0.54              | p.E292V (c.875A>T)       | Missense   | 0.990             | -6.533  | Likely-<br>pathogenic | 3.98E-06 | Compt | 0.54  |     |
|                   | p.L130P (c.389T>C)       | Missense   | 1.000             | -6.030  | -                     | -        |       |       |     |
| 0.01              | p.P248S (c.742C>T)       | Missense   | 1.000             | -5.800  | -                     | -        | Compt | 0.01  | [2] |
|                   | p.V1120F (c.3358G>T)     | Missense   | 1.000             | -4.550  | -                     | -        |       |       |     |
| <b>Hypo/null</b>  |                          |            |                   |         |                       |          |       |       |     |
| 0.11              | p.N104TfsX47 (c.309delC) | Frameshift | Truncated Protein |         | -                     | -        | Compt | 0.11  |     |
|                   | p.P246L (c.737C>T)       | Missense   | 1.000             | -9.330  | -                     | 7.98E-06 |       |       |     |
| 0.22              | p.Q233X (c.697C>T)       | Nonsense   | Truncated Protein |         | -                     | -        | Compt | 0.22  |     |
|                   | p.R280C (c.838C>T)       | Missense   | 1.000             | -5.470  | Conflicting           | 1.60E-04 |       |       |     |
| 0.16              | p.A1046E (c.3137C>A)     | Missense   | 1.000             | -4.200  | -                     | -        | Compt | 0.16  | [2] |
|                   | p.A1338T (c.4012G>A)     | Missense   | 0.146             | -0.550  | Uncertain             | 4.09E-04 |       |       |     |

|                  |                                      |            |                   |            |          |       |       |              |
|------------------|--------------------------------------|------------|-------------------|------------|----------|-------|-------|--------------|
|                  | c.4360-1G>C                          | Intron     | -                 | -          | -        | -     |       |              |
| <b>null/null</b> |                                      |            |                   |            |          |       |       |              |
| 0.04‡            | p.E1626VfsX16<br>(c.3997_3998del)    | Frameshift | Truncated Protein | -          | -        | Homo  | 0.04  | [2, 5]       |
| 0.14             | p.R1561X (c.4681C>T)                 | Nonsense   | Truncated Protein | -          | 1.21E-05 | Homo  | 0.14  | [2, 5, 8, 9] |
| 2.50             | p.R1561X (c.4681C>T)                 | Nonsense   | Truncated Protein | -          | 1.21E-05 | Homo  | 0.85* | [2]          |
| 5.00             | p.R1561X (c.4681C>T)                 | Nonsense   | Truncated Protein | -          | 1.21E-05 | Homo  | 0.59* | [2]          |
| 0.07             | p.R1561X (c.4681C>T)                 | Nonsense   | Truncated Protein | -          | 1.21E-05 | Homo  | 0.07  | [2, 5, 8, 9] |
| 0.39             | p.R1561X (c.4681C>T)                 | Nonsense   | Truncated Protein | -          | 1.21E-05 | Homo  | 0.39  | [2, 5, 8, 9] |
| 0.19‡            | p.R1561X (c.4681C>T)                 | Nonsense   | Truncated Protein | -          | 1.21E-05 | Homo  | 0.19  | [2, 5, 8, 9] |
| 0.08             | p.R1561X (c.4681C>T)                 | Nonsense   | Truncated Protein | -          | 1.21E-05 | Homo  | 0.08  | [2, 5, 8, 9] |
| 0.25             | p.R1333GfsX24<br>(c.3997_3998delAG)  | Frameshift | Truncated Protein | Pathogenic | -        | Homo  | 0.25  |              |
| 0.22‡            | c.3005-1G >A                         | Intron     | -                 | -          | -        | Homo  | 0.22  | [2]          |
| 0.19             | p.S536PfsX10<br>(c.1601_1604depACCT) | Frameshift | Truncated Protein | -          | -        | Compt | 0.19  | [2]          |
|                  | p.V1303SfsX43<br>(c.3907delG)        | Frameshift | Truncated Protein | -          | -        |       |       |              |

15 In the column ‘Age at last visit\_Year’, age marked with ‘‡’ indicated the patient was diagnosed retrospectively, otherwise prospectively. According  
 16 to records from ‘ClinVar’, ‘Conflicting<sup>#</sup>’ in ‘ClinVar’ column represented ‘Conflicting interpretations of pathogenicity’, ‘Uncertain<sup>e</sup>’ represented  
 17 ‘Uncertain significance’ and ‘-’ represented ‘not recorded’. Freq. (frequency) of variants were documented from gnomAD (v2.1.1). Genotype of



- 18 patients were grouped into homozygous (Homo) and compound heterozygous (Compt). The column 'Age at death/LTX\*' was formatted in year;
- 19 LTX\*: lung transplant. The 'Ref' column recorded published literature(s) by our and co-operated groups from Kids Lung Registry. UK: unknown.

- 20 **Supplement table 3.** Patients with ILD not analyzed for *ABCA3* because of lack of  
 21 clinically plausible reason, no material or no consent.

|                                                                                                                                                     |      |
|-----------------------------------------------------------------------------------------------------------------------------------------------------|------|
| All ILD patients in data base and not assessed for <i>ABCA3</i>                                                                                     | 1436 |
| Lung – diffuse                                                                                                                                      | 363  |
| Adult idiopathic pulmonary fibrosis (IPF)                                                                                                           | 22   |
| Alveolar microlithiasis                                                                                                                             | 4    |
| Bronchiolitis obliterans, BOOP, OP, emphysema                                                                                                       | 34   |
| Chronic pneumonitis of infancy, lipid pneumonitis, desquamative interstitial pneumonitis                                                            | 13   |
| Eosinophilic pneumonitis                                                                                                                            | 7    |
| Nonspecific interstitial pneumonia                                                                                                                  | 29   |
| Pulmonary alveolar proteinosis                                                                                                                      | 48   |
| Undefined ILD, diffuse alveolar damage                                                                                                              | 206  |
| Lung – developmental                                                                                                                                | 356  |
| ACD, acinar dysplasia, CAD, unclear developmental disorder, lung hypoplasia, pulmonary interstitial glycogenosis, cellular interstitial pneumonitis | 79   |
| NEHI / PTI                                                                                                                                          | 165  |
| Premature birth                                                                                                                                     | 112  |
| Systemic - auto-inflammatory                                                                                                                        | 16   |
| Systemic - immune dysregulated                                                                                                                      | 60   |
| Systemic – immunocompetent                                                                                                                          | 235  |
| Systemic – immunodeficient                                                                                                                          | 169  |
| Exposure - non-infectious                                                                                                                           | 79   |
| Vascular                                                                                                                                            | 158  |

- 22  
 23 BOOP: bronchiolitis obliterans combined organizing pneumonia. OP: organizing  
 24 pneumonia. ACD: alveolar capillary dysplasia. CAD: congenital acinar dysplasia.  
 25 NEHI / PTI: neuroendocrine hyperplasia of infancy / Persistent tachypnea of infancy.

**Supplement table 4.** Difference of basic characteristics between patients with homozygous and compound heterozygous *ABCA3* variants (patients from KLR database)

|                                        | <b>Total<br/>(n=44)</b> | <b>Homo<br/>(n=13)</b> | <b>Compt<br/>(n=31)</b> | <b>P value</b> |
|----------------------------------------|-------------------------|------------------------|-------------------------|----------------|
| <b>Gender</b>                          |                         |                        |                         |                |
| Female                                 | 63.6%                   | 57.1%                  | 66.7%                   | 0.5068         |
| Male                                   | 34.1%                   | 42.9%                  | 30.0%                   |                |
| Unknown                                | 2.3%                    |                        | 3.3%                    |                |
| <b>Last Follow Up Age_Year</b>         |                         |                        |                         |                |
| Median                                 | 9.3                     | 2.5                    | 8.3                     | 0.0202*        |
| 25% Percentile                         | 4.1                     | 1.3                    | 4.7                     |                |
| 75% Percentile                         | 15.0                    | 11.6                   | 15.0                    |                |
| <b>Gestational Age</b>                 |                         |                        |                         |                |
| Term                                   | 93.2%                   | 100.0%                 | 90.3%                   | 0.5402         |
| Preterm                                | 6.8%                    | 0.0%                   | 9.7%                    |                |
| <b>Birth Weight_g</b>                  |                         |                        |                         |                |
| Mean                                   | 2959.0                  | 2915.0                 | 2982.0                  | 0.5127         |
| SD                                     | 674.4                   | 775.1                  | 635.1                   |                |
| <b>Neonatal_Oxygen</b>                 |                         |                        |                         |                |
| Need                                   | 38.6%                   | 42.9%                  | 36.7%                   | 0.7477         |
| No need                                | 61.4%                   | 57.1%                  | 63.3%                   |                |
| <b>Neonatal_Mechanical Ventilation</b> |                         |                        |                         |                |
| Need                                   | 20.5%                   | 42.9%                  | 16.7%                   | 0.1317         |
| No need                                | 79.5%                   | 57.1%                  | 83.3%                   |                |

\*Mann-Whitney test two-tailed exact *P* value.

**Supplement table 5.** Additional information on patients with *ABCA3* variants with conflicting or uncertain significance.

| Pt_ID | Mutations           | Age at Last FU Year | Clinical phenotype                                                                                                        | Pathology of the lung                                                                                                                                 | Surfactant (lavage)          | In vitro data on variant                                                                                                  |
|-------|---------------------|---------------------|---------------------------------------------------------------------------------------------------------------------------|-------------------------------------------------------------------------------------------------------------------------------------------------------|------------------------------|---------------------------------------------------------------------------------------------------------------------------|
| P7    | p.R280C<br>p.A90D   | 2.8                 | Diffuse ILD, high flow treatment                                                                                          | Not available                                                                                                                                         | Reduced SP-C (30% of normal) | 70% of normal ABCA3+ vesicle volume [10]<br>Not available                                                                 |
| P13   | p.R288K<br>p.S693L  | 5.0                 | RDS, mature neonate, recurrent infections, clinically no symptoms at last follow up                                       | Not available                                                                                                                                         | Not available                | Normal ABCA3+ vesicle volume, impaired doxorubicin detoxification and defective ATPase activity [11, 12]<br>Not available |
| P16   | p.R288K<br>p.N124S  | 6.9                 | Chronic ILD, partial respiratory insufficiency, obstruction, clinically stable                                            | Not available                                                                                                                                         | Lacking SP-C                 | Normal ABCA3+ vesicle volume, impaired doxorubicin detoxification and defective ATPase activity [11, 12]<br>Not available |
| P19   | p.P766S<br>p.T1472R | 9.4                 | Chronic ILD, extensive ground glass opacity in both lungs, interlobular and intra-lobular septal and irregular thickening | Usual interstitial pneumonitis, pneumocyte type 2 hyperplasia, increased alveolar macrophages and focally abundant proteinaceous fluid in the alveoli | Not available                | Not available<br><br>Not available                                                                                        |

|     |                         |      |                                                                     |                                                                                                                                                                                                                                         |                                                  |                                                               |
|-----|-------------------------|------|---------------------------------------------------------------------|-----------------------------------------------------------------------------------------------------------------------------------------------------------------------------------------------------------------------------------------|--------------------------------------------------|---------------------------------------------------------------|
| P29 | p.P246L<br><br>p.L1104R | 13.5 | Chronic ILD, partial respiratory insufficiency, crackles, scoliosis | Prominent lobular remodeling with cystic dilated airspaces. Widened alveolar septa with mild diffuse chronic inflammation. Infiltrate and mild fibrosis (NSIP like). Focal PAP, increased macrophages, hyperplasia type II pneumocytes. | Not available                                    | Not available<br><br>Not available                            |
| P30 | p.R208W<br><br>p.S411Y  | 16.2 | Chronic ILD, DCLO 36% (age 15y), 6MWT desaturation                  | Biopsy (age 1y) chronic pneumonitis of infancy; biopsy (age 15 y) simplification of alveolar architecture, marked pneumocyte type 2 hyperplasia, foamy macrophages, eosinophilic interalveolar material                                 | Not available                                    | 88% of normal ABCA3+ vesicle volume [11]<br><br>Not available |
| P31 | p.R20L<br><br>p.G961=   | 20.3 | Chronic ILD with partial respiratory insufficiency                  | Fibrotic non-specific interstitial pneumonitis                                                                                                                                                                                          | Not available                                    | Not available<br><br>Not available                            |
| P35 | p.R709W<br><br>p.I1193M | 44.6 | Chronic ILD, reduced FVC, and DLCO                                  | Not available                                                                                                                                                                                                                           | Reduced proSP-C at 12.3 kDa, mature SP-C present | Not available<br><br>Not available                            |

Supplement figure 1.

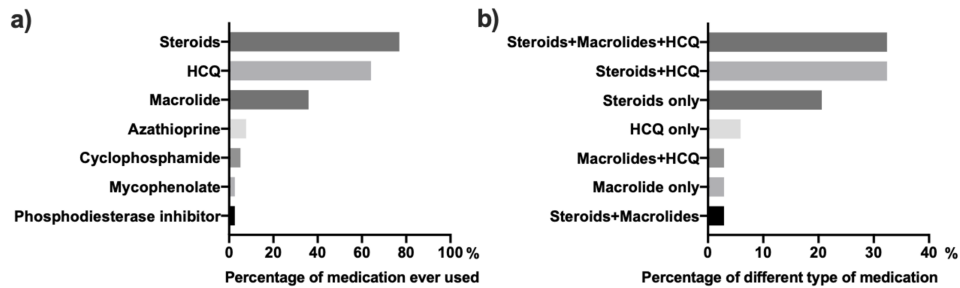

**Supplement figure 1.** Medication of patients. **a).** Percentage of patients who were ever treated with the medication indicated. **b).** For patients who ever treated with steroids, hydroxychloroquine (HCQ) and macrolides, percentage of different medication methods (alone or combination) were indicated.

## References

1. Parappil, H., et al., *Respiratory distress syndrome due to a novel homozygous ABCA3 mutation in a term neonate*. *BMJ Case Rep*, 2011. **2011**.
2. Kroner, C., et al., *Lung disease caused by ABCA3 mutations*. *Thorax*, 2017. **72**(3): p. 213-220.
3. Doan, M.L., et al., *Clinical, radiological and pathological features of ABCA3 mutations in children*. *Thorax*, 2008. **63**(4): p. 366-73.
4. Campo, I., et al., *A large kindred of pulmonary fibrosis associated with a novel ABCA3 gene variant*. *Respir Res*, 2014. **15**: p. 43.
5. Brasch, F., et al., *Alteration of the pulmonary surfactant system in full-term infants with hereditary ABCA3 deficiency*. *Am J Respir Crit Care Med*, 2006. **174**(5): p. 571-80.
6. Choi, Y. and A.P. Chan, *PROVEAN web server: a tool to predict the functional effect of amino acid substitutions and indels*. *Bioinformatics*, 2015. **31**(16): p. 2745-7.
7. Adzhubei, I.A., et al., *A method and server for predicting damaging missense mutations*. *Nat Methods*, 2010. **7**(4): p. 248-9.
8. Edwards, V., et al., *Ultrastructure of lamellar bodies in congenital surfactant deficiency*. *Ultrastruct Pathol*, 2005. **29**(6): p. 503-9.
9. Wambach, J.A., et al., *Genotype-phenotype correlations for infants and children with ABCA3 deficiency*. *Am J Respir Crit Care Med*, 2014. **189**(12): p. 1538-43.

10. Weichert, N., et al., *Some ABCA3 mutations elevate ER stress and initiate apoptosis of lung epithelial cells*. *Respir Res*, 2011. **12**: p. 4.
11. Schindlbeck, U., et al., *ABCA3 missense mutations causing surfactant dysfunction disorders have distinct cellular phenotypes*. *Hum Mutat*, 2018. **39**(6): p. 841-850.
12. Wittmann, T., et al., *Increased Risk of Interstitial Lung Disease in Children with a Single R288K Variant of ABCA3*. *Mol Med*, 2016. **22**: p. 183-191.
